# Supplementary material for: Synthesis of multi-functional green fluorescence carbon dots and their applications as a fluorescent probe for Hg2+ detection and zebrafish imaging
Source: Royal Society of Chemistry journal article supplement (doi:10.1039/c8nj01639a), 2018-01-01
Supplement: c8nj01639a1.pdf [file c8nj01639a1.pdf]

## Supporting information

### Synthesis of multi-function green fluorescence carbon dots and its application as fluorescence probe for $\text{Hg}^{2+}$ detection and zebrafish imaging

Quan Xu,<sup>\*a</sup> Miaoran Zhang,<sup>a</sup> Yao Liu,<sup>\*b</sup> Wei Cai,<sup>a</sup> Wenjing Yang,<sup>a</sup> Ziyin He,<sup>a</sup> Xiuli Sun,<sup>c</sup> Yan Luo,<sup>d</sup> Fang Liu,<sup>c</sup>

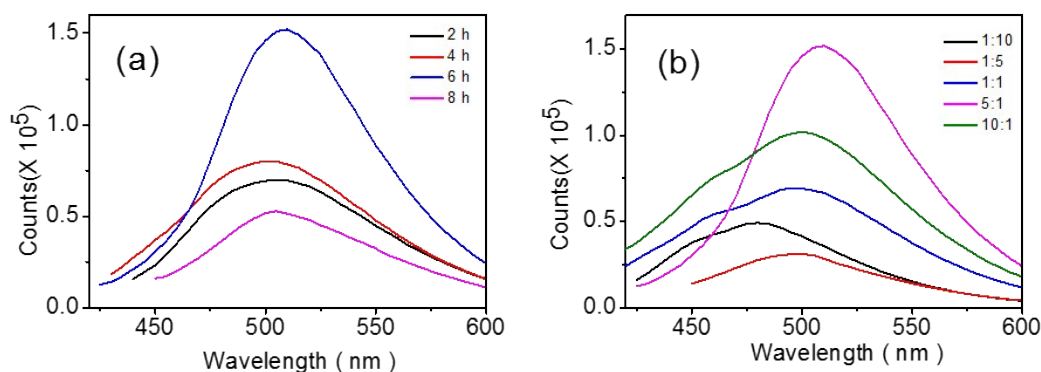

**Fig.S1** (a) At 160 °C, the spectra for different reaction times at excitation of 410 nm with the ratio of 5:1 (aniline and ethylenediamine); (b) At 160 °C, 6 h , the spectra for different ratio (aniline and ethylenediamine) at excitation of 410 nm.

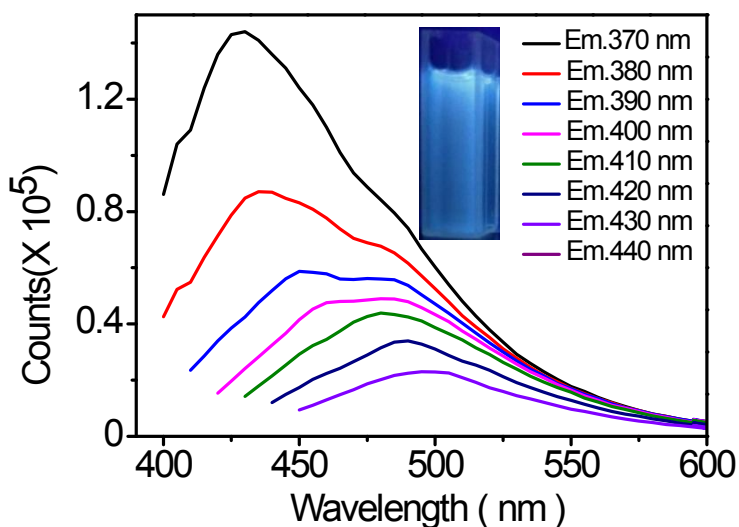

**Fig.S2** Photoluminescence spectrum of N -CDs when the ratio of aniline and ethylenediamine is 1:10.

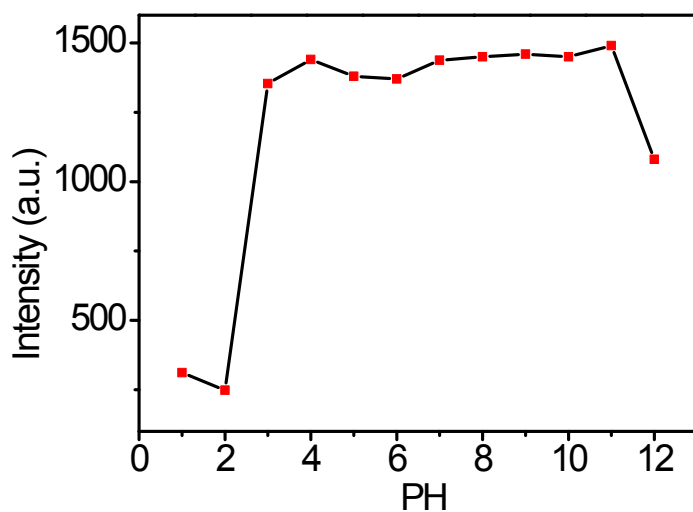

**Fig.S3** The fluorescence intensity of N-CDs in different pH values.

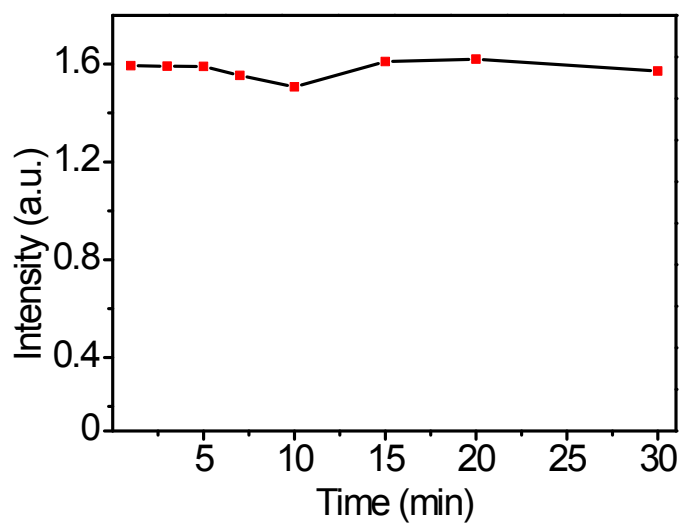

**Fig.S4** Time-dependent fluorescence changes of N-CDs in the presence of  $\text{H}_2\text{O}_2$  solution (50 mM).

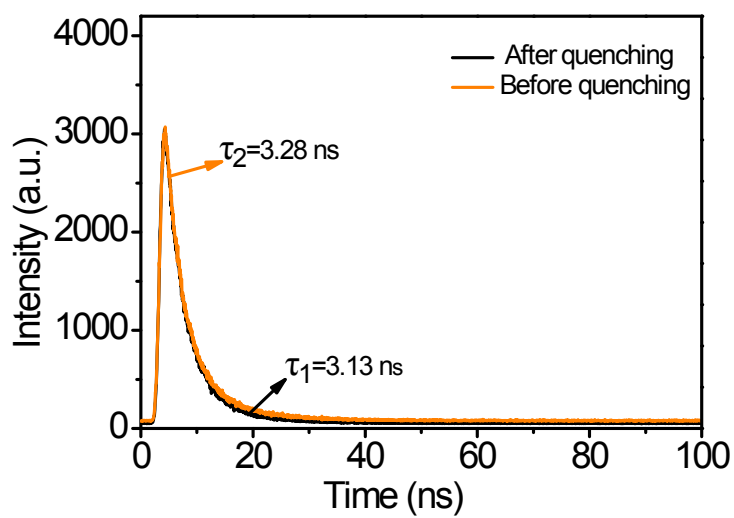

**Fig.S5** The fluorescence decays of N-CDs before and after quenching by  $\text{Hg}^{2+}$  ions.

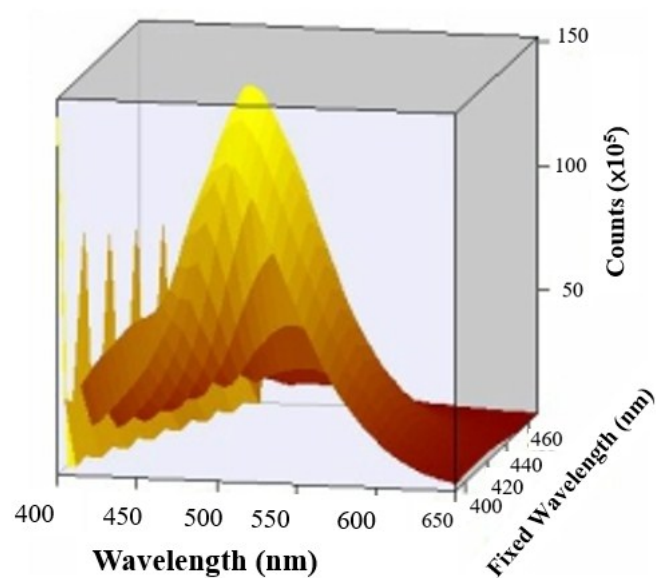

Fig. S6 The 3D map plot of the excitation spectrum and emission spectra to the N-CDs.

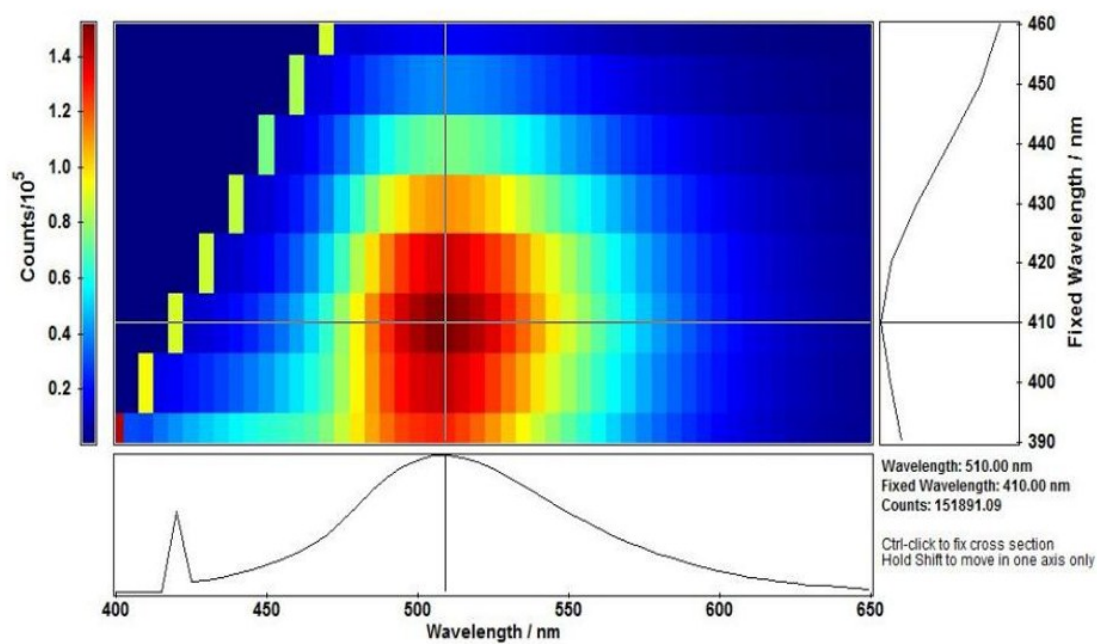

**Fig.S7** Contour plot of photoluminescence spectrum of N-CDs.

**Table 1** The content of N, O, C elements in the as-prepared carbon dots.

| Name | Atomic % |
|------|----------|
| N1s  | 25.99    |
| O1s  | 23.07    |
| C1s  | 50.94    |
